# Supplementary material for: Dual gene expression cassette vectors with antibiotic selection markers for engineering in Saccharomyces cerevisiae
Source: PubMed Central journal article supplement (PMC4231455; doi:10.1186/1475-2859-12-96), 2013-10-25
Supplement: 1475-2859-12-96-S1.pdf [file 1475-2859-12-96-S1.pdf]

## pCEV-G1-Km Plasmid Features

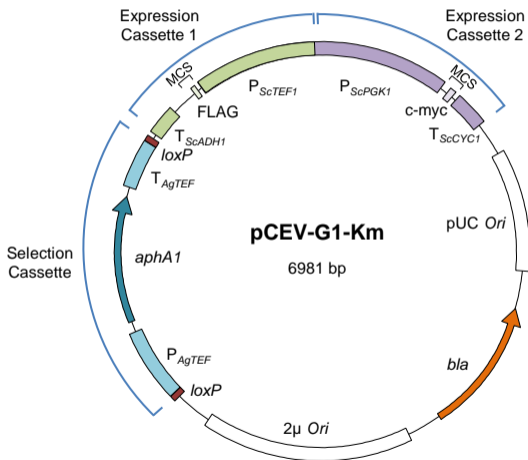

| Feature                   | Start | End  | Description                                                               |
|---------------------------|-------|------|---------------------------------------------------------------------------|
| ADH1-T R1                 | 1     | 21   | Primer site for sequencing <i>TEF1</i> promoter fusions                   |
| <i>T<sub>ScADH1</sub></i> | 166   | 2    | <i>ADH1</i> terminator from <i>Saccharomyces cerevisiae</i>               |
| FLAG                      | 315   | 341  | FLAG tag for protein tagging                                              |
| TEF-P F1                  | 635   | 616  | Primer site for sequencing <i>TEF1</i> promoter fusions                   |
| <i>P<sub>ScTEF1</sub></i> | 778   | 360  | <i>TEF1</i> promoter from <i>Saccharomyces cerevisiae</i> CEN.PK          |
| <i>P<sub>ScPGK1</sub></i> | 790   | 1771 | <i>PGK1</i> promoter from <i>Saccharomyces cerevisiae</i> CEN.PK          |
| PGK-P F1                  | 1525  | 1545 | Primer site for sequencing <i>PGK1</i> promoter fusions                   |
| c-myc                     | 1813  | 1848 | C-myc tag for protein tagging                                             |
| <i>T<sub>ScCYC1</sub></i> | 1875  | 2064 | <i>CYC1</i> terminator from <i>Saccharomyces cerevisiae</i>               |
| CYC1-T R1                 | 1925  | 1904 | Primer site for sequencing <i>PGK1</i> promoter fusions                   |
| <i>pUC Ori</i>            | 2251  | 2918 | <i>pUC</i> origin of replication for <i>Escherichia coli</i>              |
| <i>bla</i>                | 3926  | 3069 | β-lactamase gene (ampicillin resistance)                                  |
| <i>2μ Ori</i>             | 4060  | 5215 | <i>2μ</i> origin of replication for yeast                                 |
| <i>loxP</i>               | 5420  | 5453 | Recognition sequence for Cre recombinase                                  |
| <i>P<sub>AgTEF</sub></i>  | 5454  | 5851 | <i>TEF</i> promoter from <i>Ashbya gossypii</i>                           |
| <i>aphA1</i>              | 5852  | 6661 | Aminoglycoside 3'-phosphotransferase (G418/kanamycin/neomycin resistance) |
| <i>T<sub>AgTEF</sub></i>  | 6662  | 6926 | <i>TEF</i> terminator from <i>Ashbya gossypii</i>                         |
| <i>loxP</i>               | 6927  | 6960 | Recognition sequence for Cre recombinase                                  |

## pCEV-G1-Ph Plasmid Features

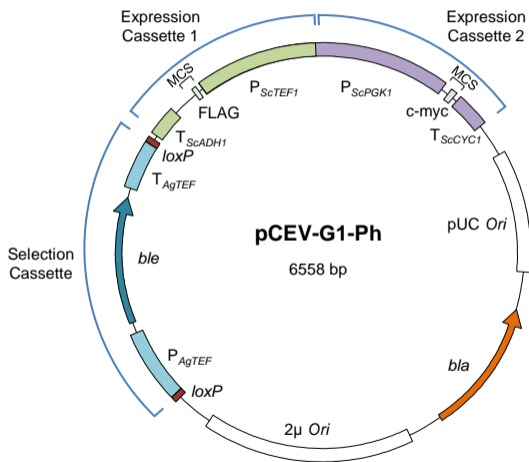

| Feature                   | Start | End  | Description                                                      |
|---------------------------|-------|------|------------------------------------------------------------------|
| ADH1-T R1                 | 1     | 21   | Primer site for sequencing <i>TEF1</i> promoter fusions          |
| <i>T<sub>ScADH1</sub></i> | 166   | 2    | <i>ADH1</i> terminator from <i>Saccharomyces cerevisiae</i>      |
| FLAG                      | 315   | 341  | FLAG tag for protein tagging                                     |
| TEF-P F1                  | 635   | 616  | Primer site for sequencing <i>TEF1</i> promoter fusions          |
| <i>P<sub>ScTEF1</sub></i> | 778   | 360  | <i>TEF1</i> promoter from <i>Saccharomyces cerevisiae</i> CEN.PK |
| <i>P<sub>ScPGK1</sub></i> | 790   | 1771 | <i>PGK1</i> promoter from <i>Saccharomyces cerevisiae</i> CEN.PK |
| PGK-P F1                  | 1525  | 1545 | Primer site for sequencing <i>PGK1</i> promoter fusions          |
| c-myc                     | 1813  | 1848 | C-myc tag for protein tagging                                    |
| <i>T<sub>ScCYC1</sub></i> | 1875  | 2064 | <i>CYC1</i> terminator from <i>Saccharomyces cerevisiae</i>      |
| CYC1-T R1                 | 1925  | 1904 | Primer site for sequencing <i>PGK1</i> promoter fusions          |
| <i>pUC Ori</i>            | 2251  | 2918 | <i>pUC</i> origin of replication for <i>Escherichia coli</i>     |
| <i>bla</i>                | 3926  | 3069 | β-lactamase gene (ampicillin resistance)                         |
| <i>2μ Ori</i>             | 4060  | 5215 | <i>2μ</i> origin of replication for yeast                        |
| <i>loxP</i>               | 5420  | 5453 | Recognition sequence for Cre recombinase                         |
| <i>P<sub>AgTEF</sub></i>  | 5454  | 5850 | <i>TEF</i> promoter from <i>Ashbya gossypii</i>                  |
| <i>ble</i>                | 5852  | 6238 | Bleomycin resistance protein                                     |
| <i>T<sub>AgTEF</sub></i>  | 6245  | 6503 | <i>TEF</i> terminator from <i>Ashbya gossypii</i>                |
| <i>loxP</i>               | 6504  | 6537 | Recognition sequence for Cre recombinase                         |

## pCEV-G2-Km Plasmid Features

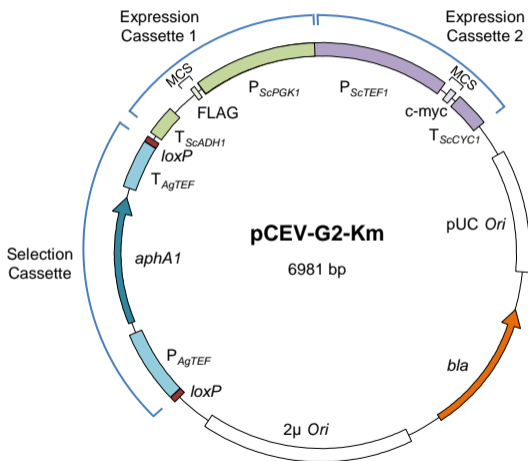

| Feature             | Start | End  | Description                                                               |
|---------------------|-------|------|---------------------------------------------------------------------------|
| ADH1-T R1           | 1     | 21   | Primer site for sequencing <i>PGK1</i> promoter fusions                   |
| T <sub>ScADH1</sub> | 166   | 2    | <i>ADH1</i> terminator from <i>Saccharomyces cerevisiae</i>               |
| FLAG                | 315   | 341  | FLAG tag for protein tagging                                              |
| PGK-P F1            | 587   | 607  | Primer site for sequencing <i>PGK1</i> promoter fusions                   |
| P <sub>ScPGK1</sub> | 1343  | 360  | <i>PGK1</i> promoter from <i>Saccharomyces cerevisiae</i> CEN.PK          |
| P <sub>ScTEF1</sub> | 1354  | 1772 | <i>TEF1</i> promoter from <i>Saccharomyces cerevisiae</i> CEN.PK          |
| TEF-P F1            | 1497  | 1516 | Primer site for sequencing <i>TEF1</i> promoter fusions                   |
| c-myc               | 1813  | 1848 | C-myc tag for protein tagging                                             |
| T <sub>ScCYC1</sub> | 1875  | 2064 | <i>CYC1</i> terminator from <i>Saccharomyces cerevisiae</i>               |
| CYC1-T R1           | 1925  | 1904 | Primer site for sequencing <i>TEF1</i> promoter fusions                   |
| pUC Ori             | 2251  | 2918 | pUC origin of replication for <i>Escherichia coli</i>                     |
| bla                 | 3926  | 3069 | β-lactamase gene (ampicillin resistance)                                  |
| 2μ Ori              | 4060  | 5206 | 2μ origin of replication for yeast                                        |
| loxP                | 5420  | 5453 | Recognition sequence for Cre recombinase                                  |
| P <sub>AgTEF</sub>  | 5454  | 5851 | <i>TEF</i> promoter from <i>Ashbya gossypii</i>                           |
| aphA1               | 5852  | 6661 | Aminoglycoside 3'-phosphotransferase (G418/kanamycin/neomycin resistance) |
| T <sub>AgTEF</sub>  | 6662  | 6926 | <i>TEF</i> terminator from <i>Ashbya gossypii</i>                         |
| loxP                | 6927  | 6960 | Recognition sequence for Cre recombinase                                  |

## pCEV-G2-Ph Plasmid Features

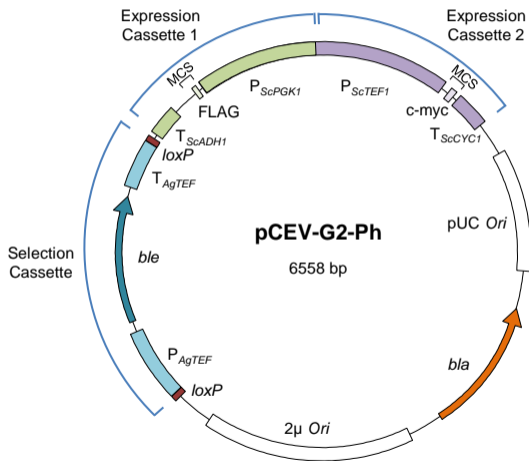

| Feature             | Start | End  | Description                                                      |
|---------------------|-------|------|------------------------------------------------------------------|
| ADH1-T R1           | 1     | 21   | Primer site for sequencing <i>PGK1</i> promoter fusions          |
| T <sub>ScADH1</sub> | 166   | 2    | <i>ADH1</i> terminator from <i>Saccharomyces cerevisiae</i>      |
| FLAG                | 315   | 341  | FLAG tag for protein tagging                                     |
| PGK-P F1            | 587   | 607  | Primer site for sequencing <i>PGK1</i> promoter fusions          |
| P <sub>ScPGK1</sub> | 1343  | 360  | <i>PGK1</i> promoter from <i>Saccharomyces cerevisiae</i> CEN.PK |
| P <sub>ScTEF1</sub> | 1354  | 1772 | <i>TEF1</i> promoter from <i>Saccharomyces cerevisiae</i> CEN.PK |
| TEF-P F1            | 1497  | 1516 | Primer site for sequencing <i>TEF1</i> promoter fusions          |
| c-myc               | 1813  | 1848 | C-myc tag for protein tagging                                    |
| T <sub>ScCYC1</sub> | 1875  | 2064 | <i>CYC1</i> terminator from <i>Saccharomyces cerevisiae</i>      |
| CYC1-T R1           | 1925  | 1904 | Primer site for sequencing <i>TEF1</i> promoter fusions          |
| pUC Ori             | 2251  | 2918 | pUC origin of replication for <i>Escherichia coli</i>            |
| bla                 | 3926  | 3069 | β-lactamase gene (ampicillin resistance)                         |
| 2μ Ori              | 4060  | 5206 | 2μ origin of replication for yeast                               |
| loxP                | 5420  | 5453 | Recognition sequence for Cre recombinase                         |
| P <sub>AgTEF</sub>  | 5454  | 5850 | <i>TEF</i> promoter from <i>Ashbya gossypii</i>                  |
| ble                 | 5852  | 6238 | Bleomycin resistance protein                                     |
| T <sub>AgTEF</sub>  | 6245  | 6503 | <i>TEF</i> terminator from <i>Ashbya gossypii</i>                |
| loxP                | 6504  | 6537 | Recognition sequence for Cre recombinase                         |

## pCEV-G3-Km Plasmid Features

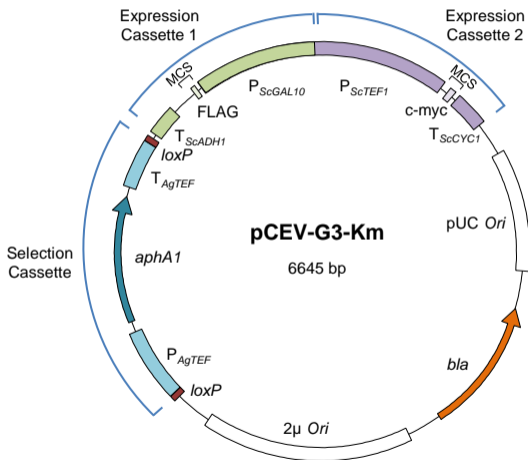

| Feature              | Start | End  | Description                                                               |
|----------------------|-------|------|---------------------------------------------------------------------------|
| ADH1-T R1            | 1     | 21   | Primer site for sequencing <i>GAL10</i> promoter fusions                  |
| T <sub>ScADH1</sub>  | 166   | 2    | <i>ADH1</i> terminator from <i>Saccharomyces cerevisiae</i>               |
| FLAG                 | 315   | 341  | FLAG tag for protein tagging                                              |
| SFB018               | 440   | 417  | Primer site for sequencing <i>GAL10</i> promoter fusions                  |
| P <sub>ScGAL10</sub> | 1008  | 351  | <i>GAL10</i> promoter from <i>Saccharomyces cerevisiae</i> CEN.PK         |
| P <sub>ScTEF1</sub>  | 1018  | 1436 | <i>TEF1</i> promoter from <i>Saccharomyces cerevisiae</i> CEN.PK          |
| TEF-P F1             | 1161  | 1180 | Primer site for sequencing <i>TEF1</i> promoter fusions                   |
| c-myc                | 1477  | 1512 | C-myc tag for protein tagging                                             |
| T <sub>ScCYC1</sub>  | 1539  | 1728 | <i>CYC1</i> terminator from <i>Saccharomyces cerevisiae</i>               |
| CYC1-T R1            | 1589  | 1568 | Primer site for sequencing <i>TEF1</i> promoter fusions                   |
| pUC Ori              | 1915  | 2582 | pUC origin of replication for <i>Escherichia coli</i>                     |
| bla                  | 3590  | 2733 | β-lactamase gene (ampicillin resistance)                                  |
| 2μ Ori               | 3724  | 4870 | 2μ origin of replication for yeast                                        |
| loxP                 | 5084  | 5117 | Recognition sequence for Cre recombinase                                  |
| P <sub>AgTEF</sub>   | 5118  | 5515 | <i>TEF</i> promoter from <i>Ashbya gossypii</i>                           |
| aphA1                | 5516  | 6325 | Aminoglycoside 3'-phosphotransferase (G418/kanamycin/neomycin resistance) |
| T <sub>AgTEF</sub>   | 6326  | 6590 | <i>TEF</i> terminator from <i>Ashbya gossypii</i>                         |
| loxP                 | 6591  | 6624 | Recognition sequence for Cre recombinase                                  |

## pCEV-G3-Ph Plasmid Features

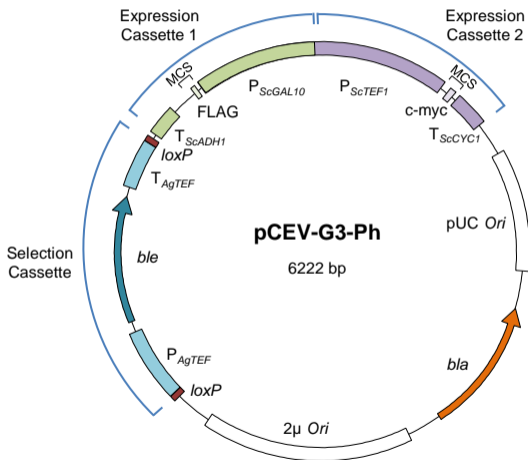

| Feature              | Start | End  | Description                                                       |
|----------------------|-------|------|-------------------------------------------------------------------|
| ADH1-T R1            | 1     | 21   | Primer site for sequencing <i>GAL10</i> promoter fusions          |
| T <sub>ScADH1</sub>  | 166   | 2    | <i>ADH1</i> terminator from <i>Saccharomyces cerevisiae</i>       |
| FLAG                 | 315   | 341  | FLAG tag for protein tagging                                      |
| SFB018               | 440   | 417  | Primer site for sequencing <i>GAL10</i> promoter fusions          |
| P <sub>ScGAL10</sub> | 1008  | 351  | <i>GAL10</i> promoter from <i>Saccharomyces cerevisiae</i> CEN.PK |
| P <sub>ScTEF1</sub>  | 1018  | 1436 | <i>TEF1</i> promoter from <i>Saccharomyces cerevisiae</i> CEN.PK  |
| TEF-P F1             | 1161  | 1180 | Primer site for sequencing <i>TEF1</i> promoter fusions           |
| c-myc                | 1477  | 1512 | C-myc tag for protein tagging                                     |
| T <sub>ScCYC1</sub>  | 1539  | 1728 | <i>CYC1</i> terminator from <i>Saccharomyces cerevisiae</i>       |
| CYC1-T R1            | 1589  | 1568 | Primer site for sequencing <i>TEF1</i> promoter fusions           |
| pUC Ori              | 1915  | 2582 | pUC origin of replication for <i>Escherichia coli</i>             |
| bla                  | 3590  | 2733 | β-lactamase gene (ampicillin resistance)                          |
| 2μ Ori               | 3724  | 4870 | 2μ origin of replication for yeast                                |
| loxP                 | 5084  | 5117 | Recognition sequence for Cre recombinase                          |
| P <sub>AgTEF</sub>   | 5118  | 5514 | <i>TEF</i> promoter from <i>Ashbya gossypii</i>                   |
| ble                  | 5516  | 5902 | Bleomycin resistance protein                                      |
| T <sub>AgTEF</sub>   | 5909  | 6167 | <i>TEF</i> terminator from <i>Ashbya gossypii</i>                 |
| loxP                 | 6168  | 6201 | Recognition sequence for Cre recombinase                          |

## pCEV-G4-Km Plasmid Features

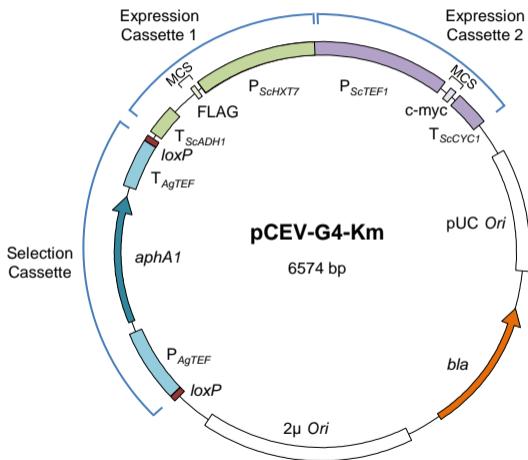

| Feature             | Start | End  | Description                                                               |
|---------------------|-------|------|---------------------------------------------------------------------------|
| ADH1-T R1           | 1     | 21   | Primer site for sequencing <i>HXT7</i> promoter fusions                   |
| T <sub>ScADH1</sub> | 166   | 2    | <i>ADH1</i> terminator from <i>Saccharomyces cerevisiae</i>               |
| FLAG                | 315   | 341  | FLAG tag for protein tagging                                              |
| SFB017              | 510   | 488  | Primer site for sequencing <i>HXT7</i> promoter fusions                   |
| P <sub>ScHXT7</sub> | 937   | 352  | <i>HXT7</i> promoter from <i>Saccharomyces cerevisiae</i>                 |
| P <sub>ScTEF1</sub> | 947   | 1365 | <i>TEF1</i> promoter from <i>Saccharomyces cerevisiae</i> CEN.PK          |
| TEF-P F1            | 1090  | 1109 | Primer site for sequencing <i>TEF1</i> promoter fusions                   |
| c-myc               | 1406  | 1441 | C-myc tag for protein tagging                                             |
| T <sub>ScCYC1</sub> | 1468  | 1657 | <i>CYC1</i> terminator from <i>Saccharomyces cerevisiae</i>               |
| CYC1-T R1           | 1518  | 1497 | Primer site for sequencing <i>TEF1</i> promoter fusions                   |
| pUC Ori             | 1844  | 2511 | pUC origin of replication for <i>Escherichia coli</i>                     |
| bla                 | 3519  | 2662 | β-lactamase gene (ampicillin resistance)                                  |
| 2μ Ori              | 3653  | 4799 | 2μ origin of replication for yeast                                        |
| loxP                | 5013  | 5046 | Recognition sequence for Cre recombinase                                  |
| P <sub>AgTEF</sub>  | 5047  | 5444 | <i>TEF</i> promoter from <i>Ashbya gossypii</i>                           |
| aphA1               | 5445  | 6254 | Aminoglycoside 3'-phosphotransferase (G418/kanamycin/neomycin resistance) |
| T <sub>AgTEF</sub>  | 6255  | 6519 | <i>TEF</i> terminator from <i>Ashbya gossypii</i>                         |
| loxP                | 6520  | 6553 | Recognition sequence for Cre recombinase                                  |

# pCEV-G4-Ph Plasmid Features

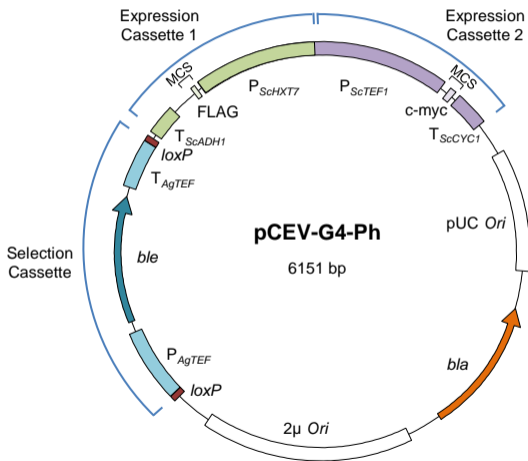

| Feature             | Start | End  | Description                                                      |
|---------------------|-------|------|------------------------------------------------------------------|
| ADH1-T R1           | 1     | 21   | Primer site for sequencing <i>HXT7</i> promoter fusions          |
| T <sub>ScADH1</sub> | 166   | 2    | <i>ADH1</i> terminator from <i>Saccharomyces cerevisiae</i>      |
| FLAG                | 315   | 341  | FLAG tag for protein tagging                                     |
| SFB017              | 510   | 488  | Primer site for sequencing <i>HXT7</i> promoter fusions          |
| P <sub>ScHXT7</sub> | 937   | 352  | <i>HXT7</i> promoter from <i>Saccharomyces cerevisiae</i>        |
| P <sub>ScTEF1</sub> | 947   | 1365 | <i>TEF1</i> promoter from <i>Saccharomyces cerevisiae</i> CEN.PK |
| TEF-P F1            | 1090  | 1109 | Primer site for sequencing <i>TEF1</i> promoter fusions          |
| c-myc               | 1406  | 1441 | C-myc tag for protein tagging                                    |
| T <sub>ScCYC1</sub> | 1468  | 1657 | <i>CYC1</i> terminator from <i>Saccharomyces cerevisiae</i>      |
| CYC1-T R1           | 1518  | 1497 | Primer site for sequencing <i>TEF1</i> promoter fusions          |
| pUC Ori             | 1844  | 2511 | pUC origin of replication for <i>Escherichia coli</i>            |
| bla                 | 3519  | 2662 | β-lactamase gene (ampicillin resistance)                         |
| 2μ Ori              | 3653  | 4799 | 2μ origin of replication for yeast                               |
| loxP                | 5013  | 5046 | Recognition sequence for Cre recombinase                         |
| P <sub>AgTEF</sub>  | 5047  | 5443 | <i>TEF</i> promoter from <i>Ashbya gossypii</i>                  |
| ble                 | 5445  | 5831 | Bleomycin resistance protein                                     |
| T <sub>AgTEF</sub>  | 5838  | 6096 | <i>TEF</i> terminator from <i>Ashbya gossypii</i>                |
| loxP                | 6097  | 6130 | Recognition sequence for Cre recombinase                         |
